# Supplementary material for: Pharmacokinetics and Tissue Distribution of Rosuvastatin in a Rat Model of Preeclampsia
Source: Preprints.org preprint supplement (doi:10.20944/preprints202405.1968.v1), 2024-05-29
Supplement: Supplementary file 1 [file supplementary]

**Supplementary Materials**

**A**   **B**

**Figure S1**. Confirmation of PE characteristics in the immunological rat model of PE. **A.** Urinary Total Protein:Creatinine Ratios. Urine was collected from PE and control rats (n=12/group) at baseline on GD13, and after induction of PE on GD16, and GD18. **B.** IL-6 Serum Concentrations. Protein levels of IL-6 were measured in serum obtained from PE and control dams by ELISA. Data is presented as mean ± S.D. (n=12/group). Significance was determined using Student’s unpaired t-test (*p < 0.05, **p<0.01, ***p<0.001).

**Figure S2**. Rosuvastatin placenta:plasma concentration ratio in control rats and PE rats. The concentrations of RSV in the placenta (ng/g) was normalized to the concentration of RSV in maternal plasma (ng/ml) at the same time point and are shown as placenta:plasma concentration ratio (n=3-4/group). RSV concentrations were determined as described in methods and are presented as mean ± S.D. Significance was determined using Student’s unpaired t-test (*p<0.05;**p<0.01).
